# Supplementary material for: Controlled plasmon-induced nonlinear absorption and optical limiting in Al/PVP composite nanofibers
Source: Royal Society of Chemistry journal article supplement (doi:10.1039/d3nr03859a), 2023-01-01
Supplement: d3nr03859a1.pdf [file d3nr03859a1.pdf]

Supporting Information for

**Controlled plasmon-induced nonlinear absorption and optical limiting in Al/PVP  
composite nanofibers**

Bekir Asilcan Ünlü<sup>a</sup>, Serife Akkoyun<sup>b,c,\*</sup>, Ahmet Karatay<sup>a,\*</sup>, Aytunc Ates<sup>b</sup>, Ayhan Elmali<sup>a</sup>

<sup>a</sup>Department of Engineering Physics, Faculty of Engineering, Ankara University, 06100 Ankara, Türkiye

<sup>b</sup>Department of Metallurgical and Materials Engineering, Faculty of Engineering and Natural Sciences,  
Ankara Yildirim Beyazit University, 06010 Ankara, Türkiye

<sup>c</sup>Central Research Laboratory, Application and Research Center, Ankara Yildirim Beyazit University,  
06010 Ankara, Türkiye

\*Corresponding authors: [akaratay@eng.ankara.edu.tr](mailto:akaratay@eng.ankara.edu.tr) (A. KARATAY), [sakkoyun@ybu.edu.tr](mailto:sakkoyun@ybu.edu.tr) (S.  
AKKOYUN)

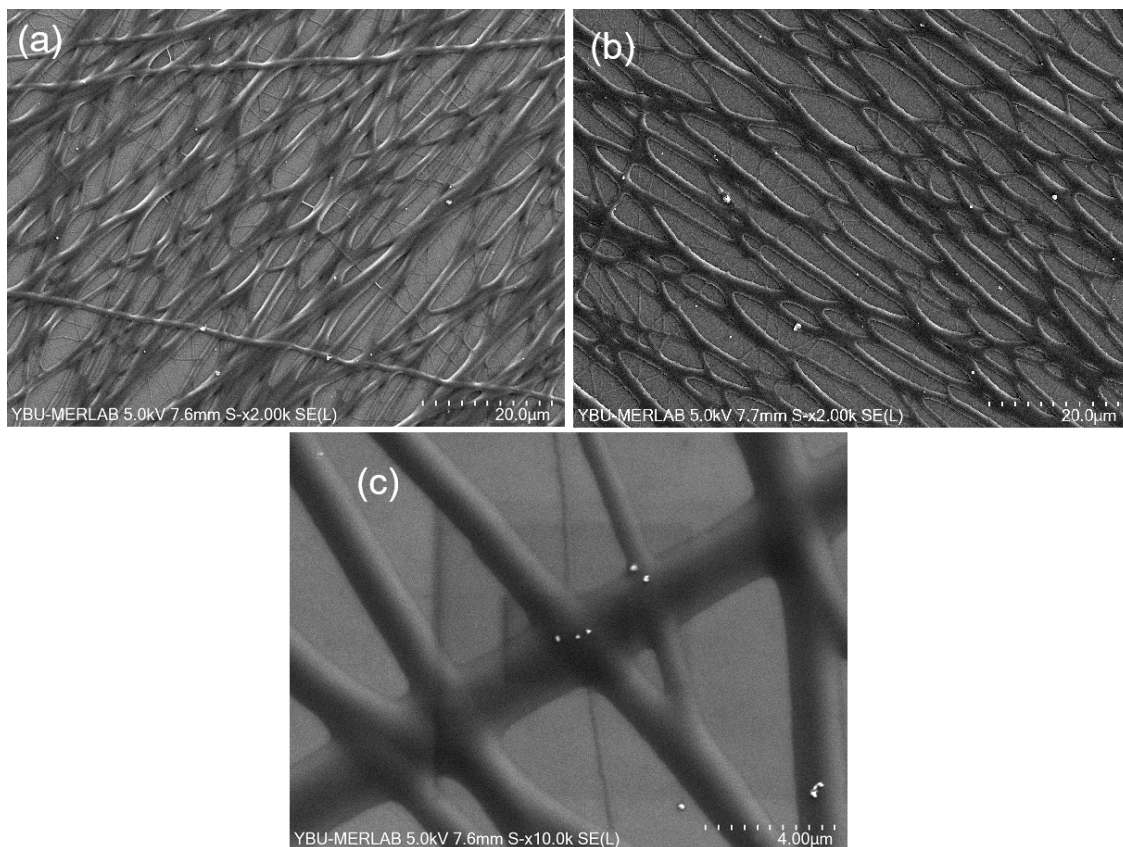

**Fig. S1** Sem images after optical tests

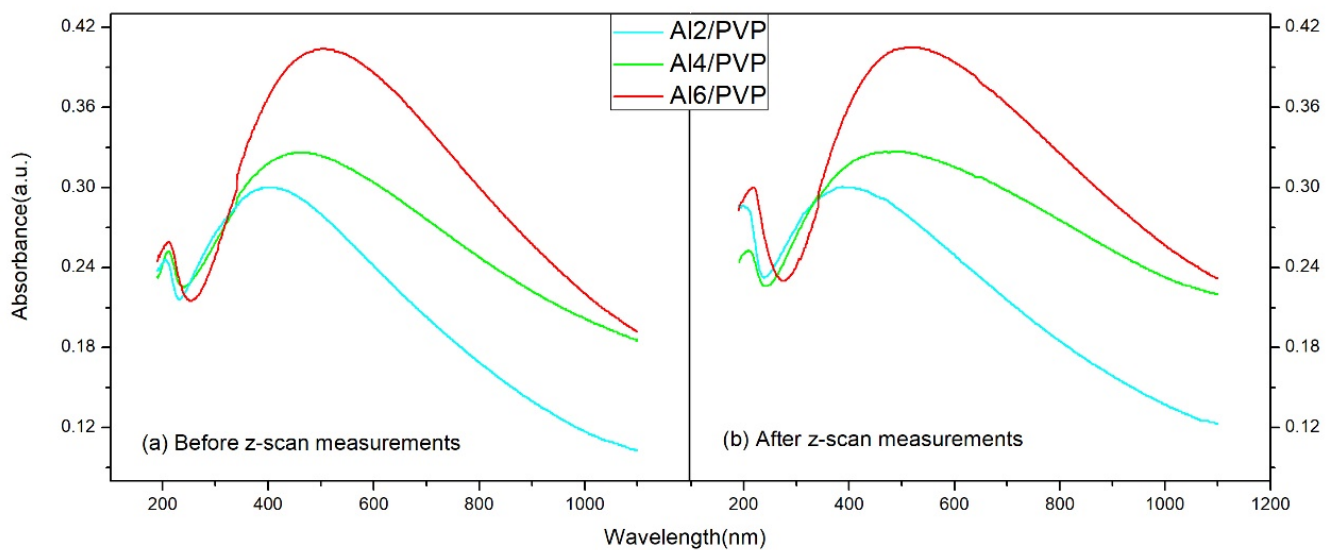

**Fig. S2** Transmittance spectra of Al/PVP samples (a) before (b) after Z-scan experiments
